# Supplementary material for: Synthesis and characterization of multifunctional superparamagnetic iron oxide nanoparticles (SPION)/C60 nanocomposites assembled by fullerene–amine click chemistry
Source: Royal Society of Chemistry journal article supplement (doi:10.1039/c6ra14047e), 2016-01-01
Supplement: c6ra14047e1.pdf [file c6ra14047e1.pdf]

**Electronic Supporting Information**

**Synthesis and characterization of multifunctional superparamagnetic iron oxide nanoparticles (SPION)/C60 nanocomposites assembled by fullerene-amine click chemistry**

Manuel Cano,<sup>a,b,d\*</sup> Rebeca Núñez-Lozano,<sup>a,b</sup> Yves Dumont,<sup>c</sup> Chantal Larpent<sup>d\*</sup> and Guillermo de la Cueva-Méndez<sup>a,b\*</sup>

<sup>a</sup>BIONAND, Andalusian Centre for Nanomedicine and Biotechnology (Junta de Andalucía, Universidad de Málaga), Severo Ochoa 35, 29590 Campanillas, Málaga, Spain.

\*Corresponding Authors E-mail: [mcano@bionand.es](mailto:mcano@bionand.es), [gdelacueva@bionand.es](mailto:gdelacueva@bionand.es); Fax: +34 952367610; Tel: +34 952367611

<sup>b</sup>Institute of Biomedical Research in Málaga, IBIMA. Avda. Jorge Luis Borges 15, Bloque 3, Planta 3<sup>a</sup>, 29010 Málaga, Spain.

<sup>c</sup>Groupe d'Etudes de la Matière Condensée (GEMaC), UMR 8635, Université de Versailles St Quentin en Yvelines and CNRS, Université Paris-Saclay, 45 Avenue des Etats-Unis, 78035 Versailles, France.

<sup>d</sup>Institut Lavoisier de Versailles, UMR CNRS 8180, Université de Versailles-Saint-Quentin-en-Yvelines, Université Paris-Saclay, 45 Avenue des Etats-Unis, 78035 Versailles Cedex, France.

\* Corresponding Author E-mail: [chantal.larpent@uvsq.fr](mailto:chantal.larpent@uvsq.fr); Fax: +33 139 254 452; Tel: +33 139 254 413

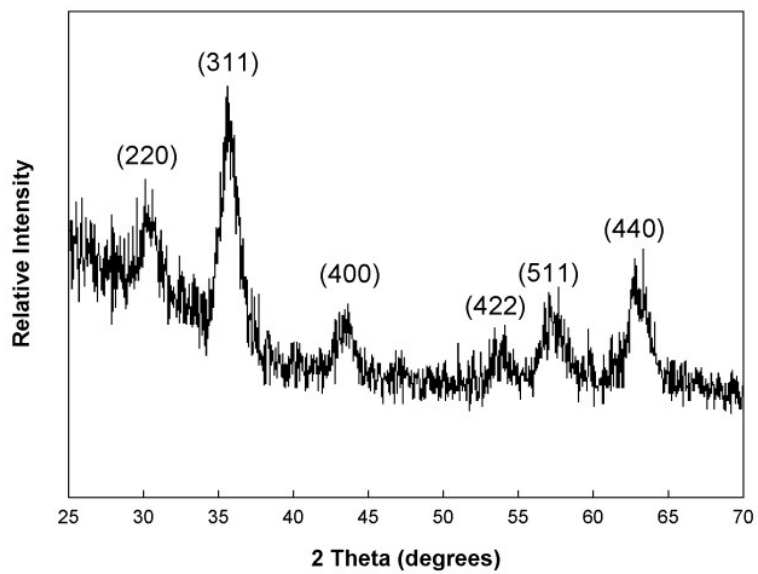

**Figure S1:** XRD of SPION-OA.

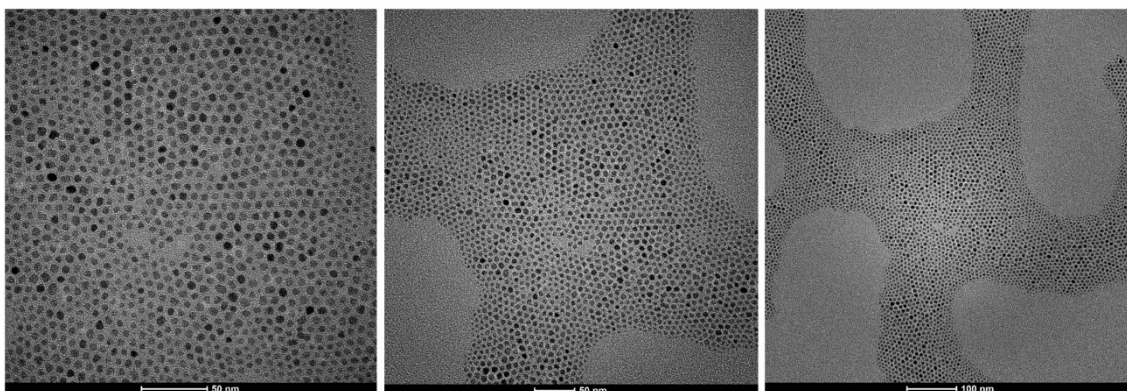

**Figure S2:** Additional TEM images of SPION-OA.
